# Supplementary material for: Formation of new polymorphs without any nucleation step. Desolvation of the rimonabant monohydrate: directional crystallisation concomitant to smooth dehydration
Source: Royal Society of Chemistry journal article supplement (doi:10.1039/c4fd00222a), 2015-01-01
Supplement: c4fd00222a1.pdf [file c4fd00222a1.pdf]

## SUPPORTING INFORMATION

### Formation of New Polymorphs Without any Nucleation Step. Desolvation of the Rimonabant Monohydrate: Directional Crystallisation Concomitant to Smooth Dehydration

**Baptiste Fours, Yohann Cartigny, Samuel Petit and Gérard Coquerel\***

*Normandie Université; EA 3233 SMS, Crystal Genesis Unit, University of Rouen,  
F-76821 Mont Saint Aignan, France. Fax-Tel: 33 23552 2927  
E-mail: gerard.coquerel@univ-rouen.fr*

#### CONTENTS :

1. DSC curve of the amorphous form of Rimonabant
2. DVS analysis at 20 °C for Rimonabant (form I)
3. DVS analysis at 20 °C for Rimonabant (form II)

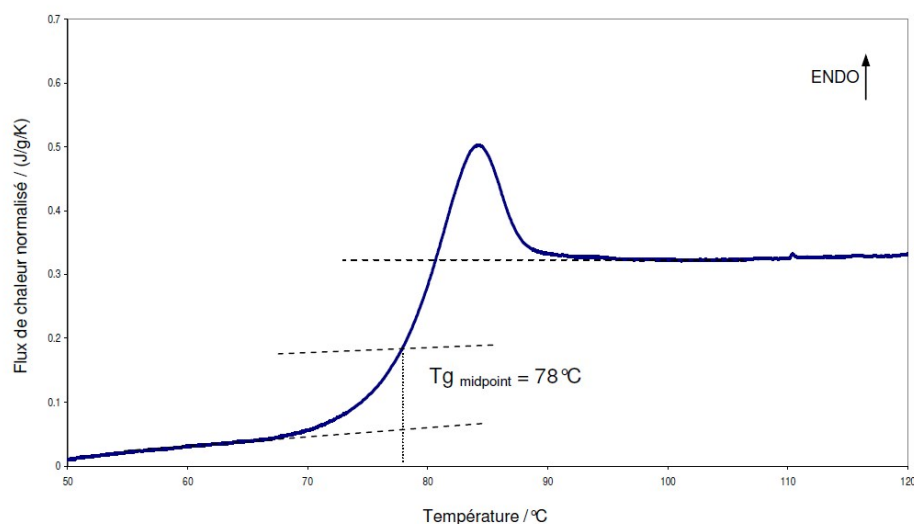

Figure S1. DSC analysis and determination of Tg for the amorphous form of Rimonabant produced by fast cooling after thermal dehydration and melting.

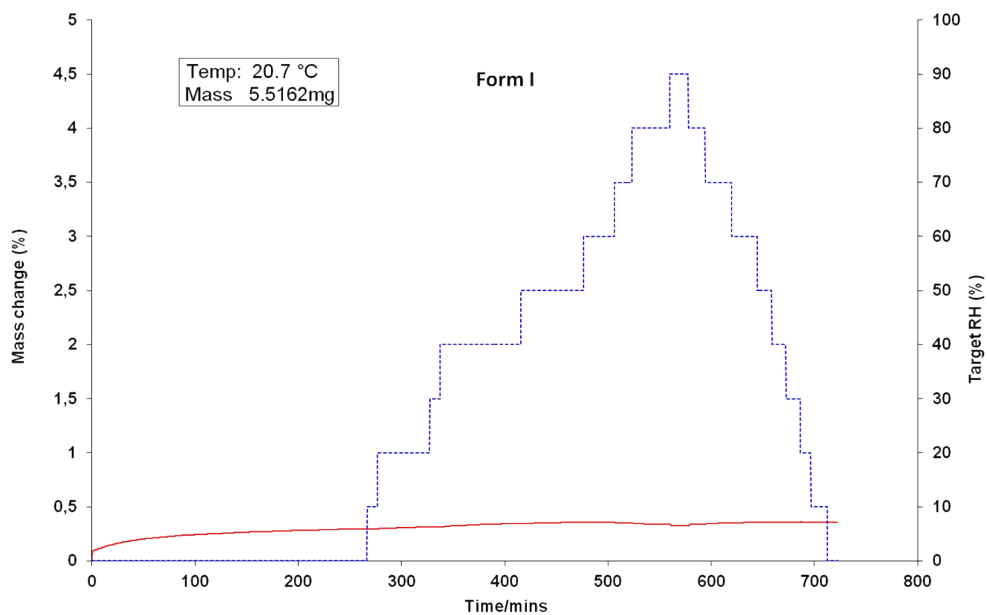

Figure S2. Mass change of Rimobant (Form I) as a function of time and relative humidity at 20°C. Dotted lines are related to R.H. variations.

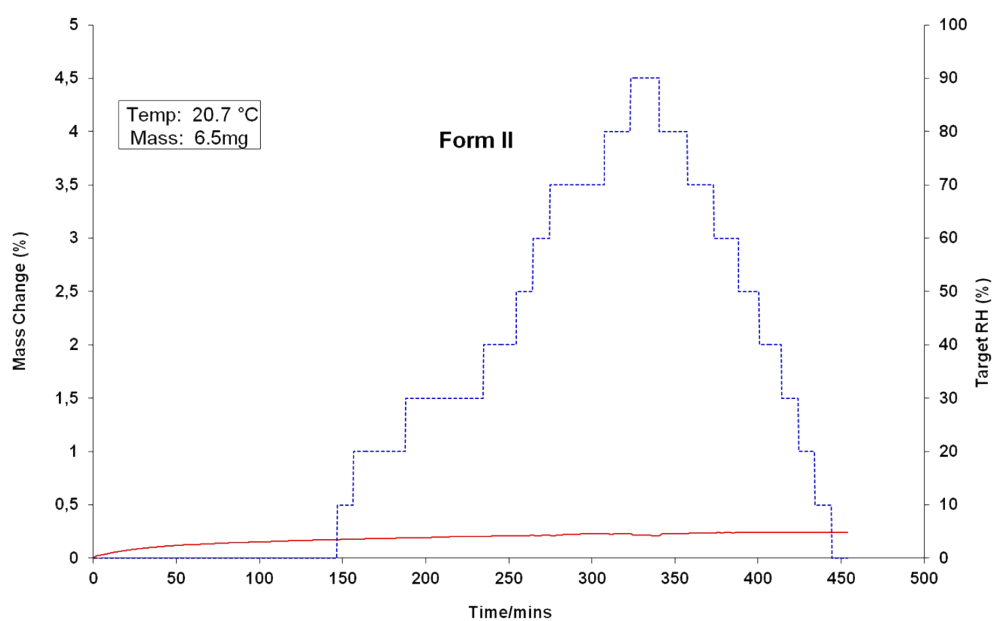

Figure S3. Mass change of Rimobant (Form II) as a function of time and relative humidity at 20°C. Dotted lines are related to R.H. variations.
